# Supplementary material for: Bioactive Compounds, Antioxidant Activities, and HPLC Analysis of Nine Edible Sprouts in Cambodia
Source: MDPI journal article supplement (doi:10.3390/molecules28062874), 2023-03-22
Supplement: s1 [file s1]

# Supplementary Materials

*Article*

## Bioactive Compounds, Antioxidant Activities, and HPLC Analysis of Nine Edible Sprouts in Cambodia

Visessakseth So<sup>1</sup>, Philip Poul<sup>1</sup>, Sokunvary Oeung<sup>2</sup>, Pich Srey<sup>1</sup>, Kimchhay Mao<sup>3</sup>, Huykhim Ung<sup>3</sup>, Poliny Eng<sup>3</sup>, Mengkhim Heim<sup>4</sup>, Marnick Srun<sup>5</sup>, Chantha Chheng<sup>6</sup>, Sin Chea<sup>7</sup>, Tarapong Srisongkram<sup>8,9</sup> and Natthida Weerapreeyakul<sup>8,9,\*</sup>

<sup>1</sup> Division of Pharmacognosy, Faculty of Pharmacy, University of Puthisastra, Phnom Penh, 120204, Cambodia; svisessakseth@puthisastra.edu.kh (V.S.); pphilip.student@puthisastra.edu.kh (P.P.); spich2@puthisastra.edu.kh (P.S.)

<sup>2</sup> Division of Toxicology, Faculty of Pharmacy, University of Puthisastra, Phnom Penh, 120204, Cambodia; osokunvary1@puthisastra.edu.kh (S.O.)

<sup>3</sup> Division of Basic Pharmaceutical Sciences, Faculty of Pharmacy, University of Puthisastra, Phnom Penh, 120204, Cambodia; uhuykhim@puthisastra.edu.kh (H.U.); mkimchhay@puthisastra.edu.kh (K.M.); epoliny@puthisastra.edu.kh (P.E.)

<sup>4</sup> Division of Pharmacology, Faculty of Pharmacy, University of Puthisastra, Phnom Penh, 120204, Cambodia; hmengkhim@puthisastra.edu.kh (M.H.)

<sup>5</sup> Department of Technology Research and Development, National Institute of Science, Technology and Innovation, Phnom Penh, 120601, Cambodia; srun.marnick@misti.gov.kh (M.S.)

<sup>6</sup> Division of Pharmaceutical Technology, Faculty of Pharmacy, University of Puthisastra, Phnom Penh, 120204, Cambodia; cchantha@puthisastra.edu.kh (C.C.)

<sup>7</sup> Faculty of Pharmacy, University of Puthisastra, Phnom Penh, 120204, Cambodia; csin1@puthisastra.edu.kh (S.C.)

<sup>8</sup> Division of Pharmaceutical Chemistry, Faculty of Pharmaceutical Sciences, Khon Kaen University, Khon Kaen, 40002, Thailand; natthida@kku.ac.th (N.W.); tarasri@kku.ac.th (T.S.)

<sup>9</sup> Human High Performance and Health Promotion Research Institute, Khon Kaen University, Khon Kaen, 40002, Thailand

\* Correspondence: natthida@kku.ac.th; Tel.: +66 43 202 378

**Supplementary Material, Figure S1**

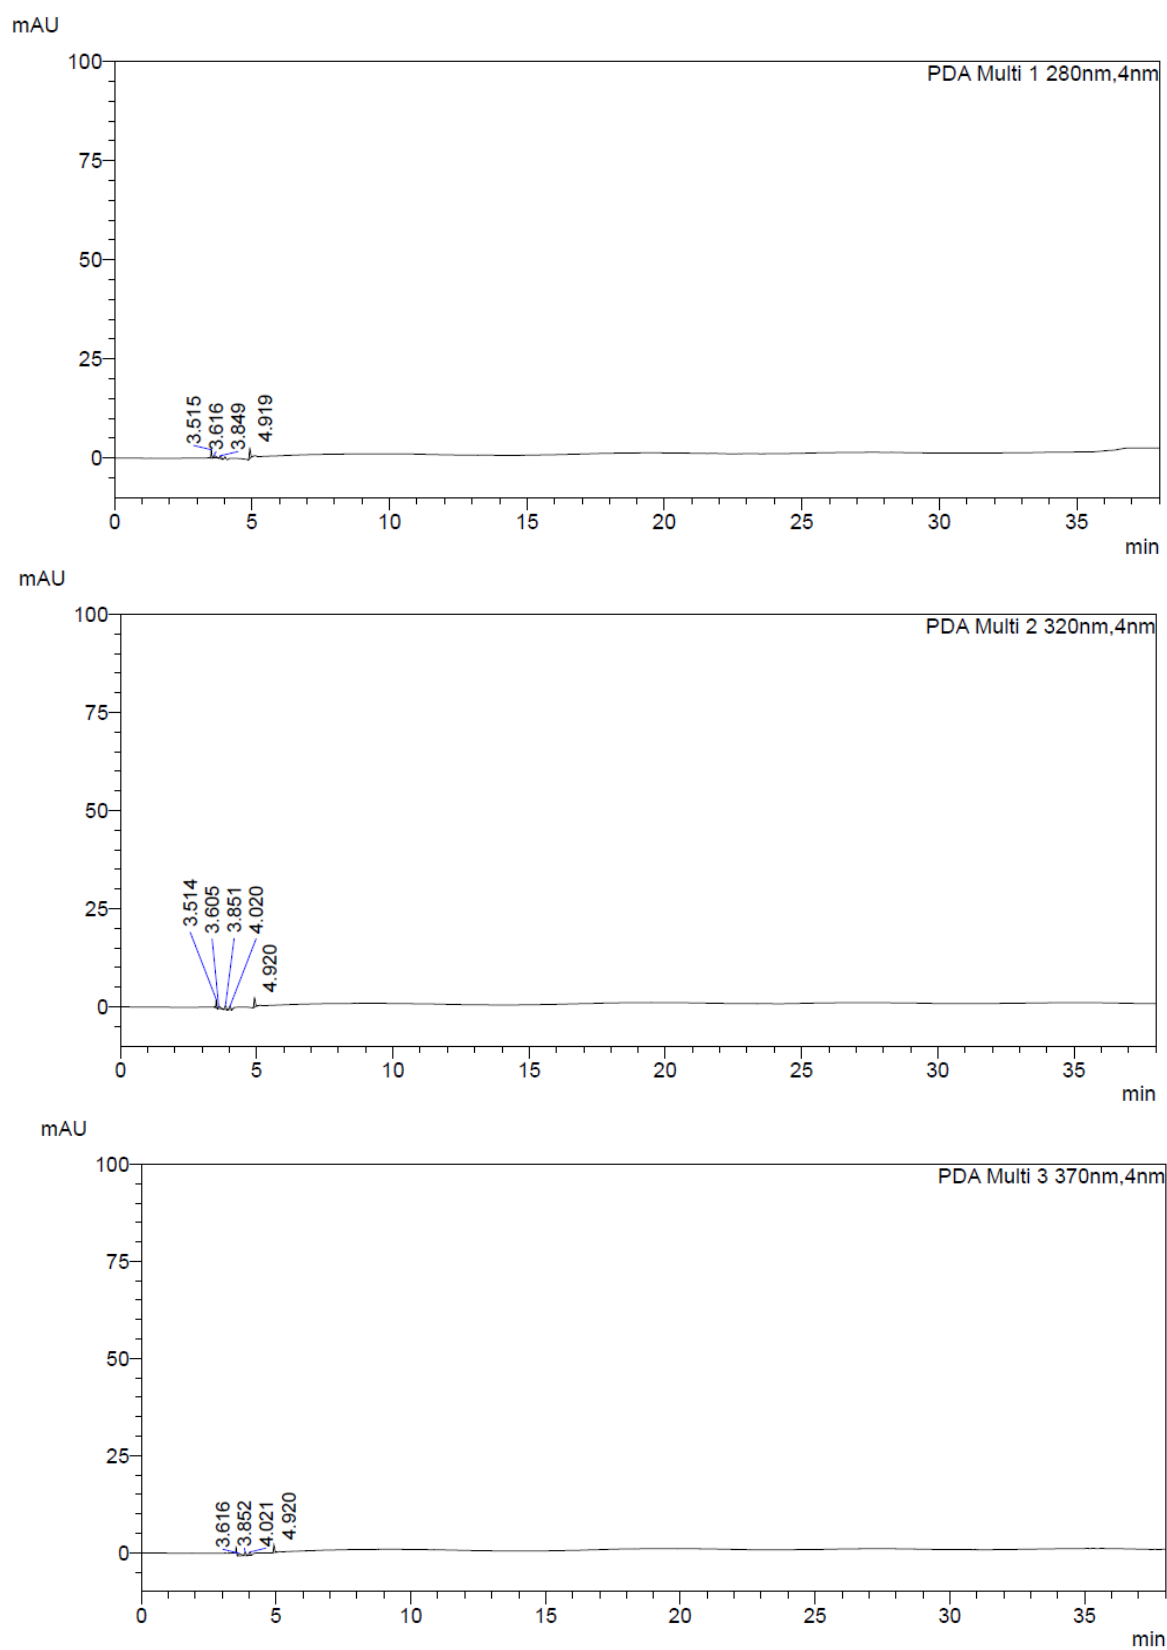

**Figure S1.** HPLC chromatograms of methanol were detected at 280, 320, and 370 nm.

## Supplementary Material, Figure S2

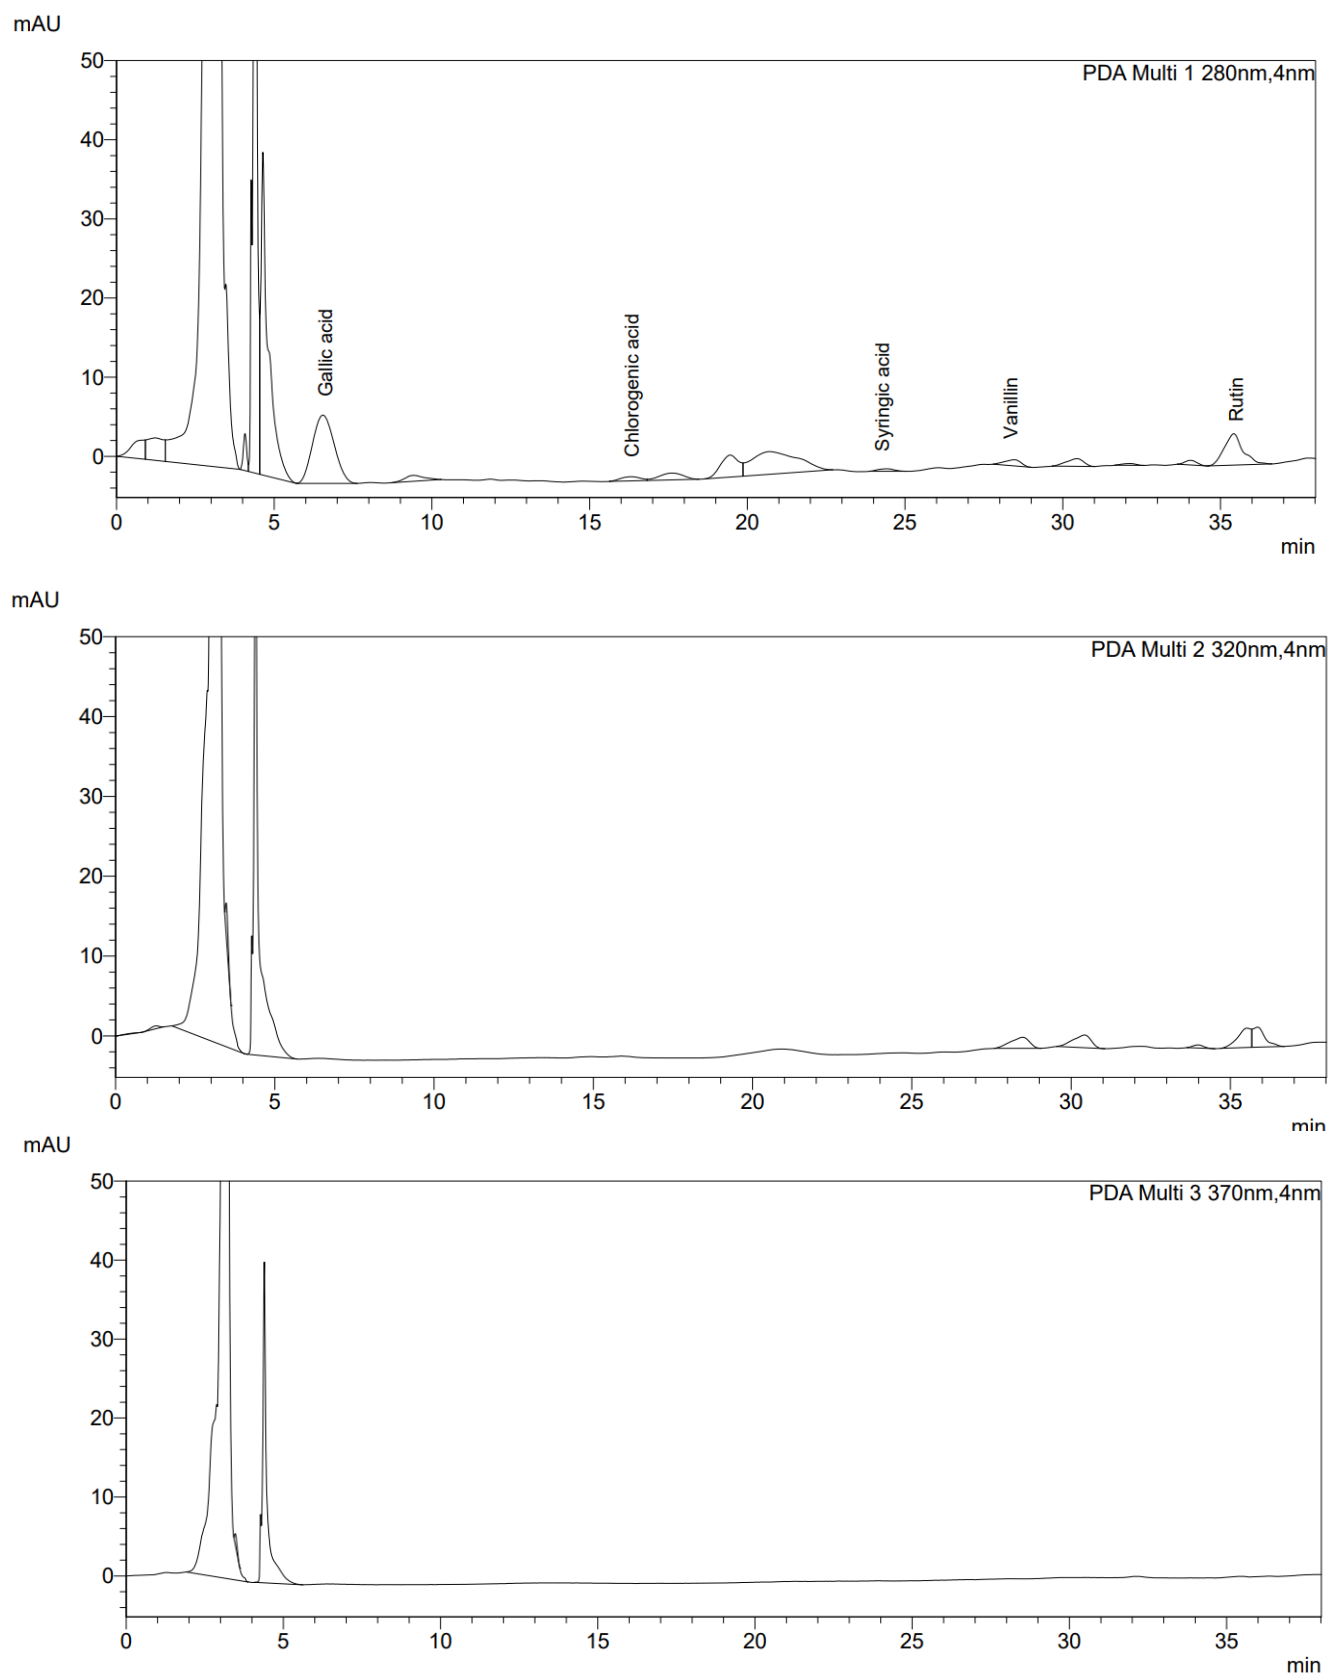

**Figure S2.** HPLC chromatograms of soybean sprout extract at 10 mg/ml in methanol were detected at 280, 320, and 370 nm showing peaks for gallic acid, chlorogenic acid, syringic acid, vanillin, rutin, and other unknown peaks.

**Supplementary Material, Figure S3**

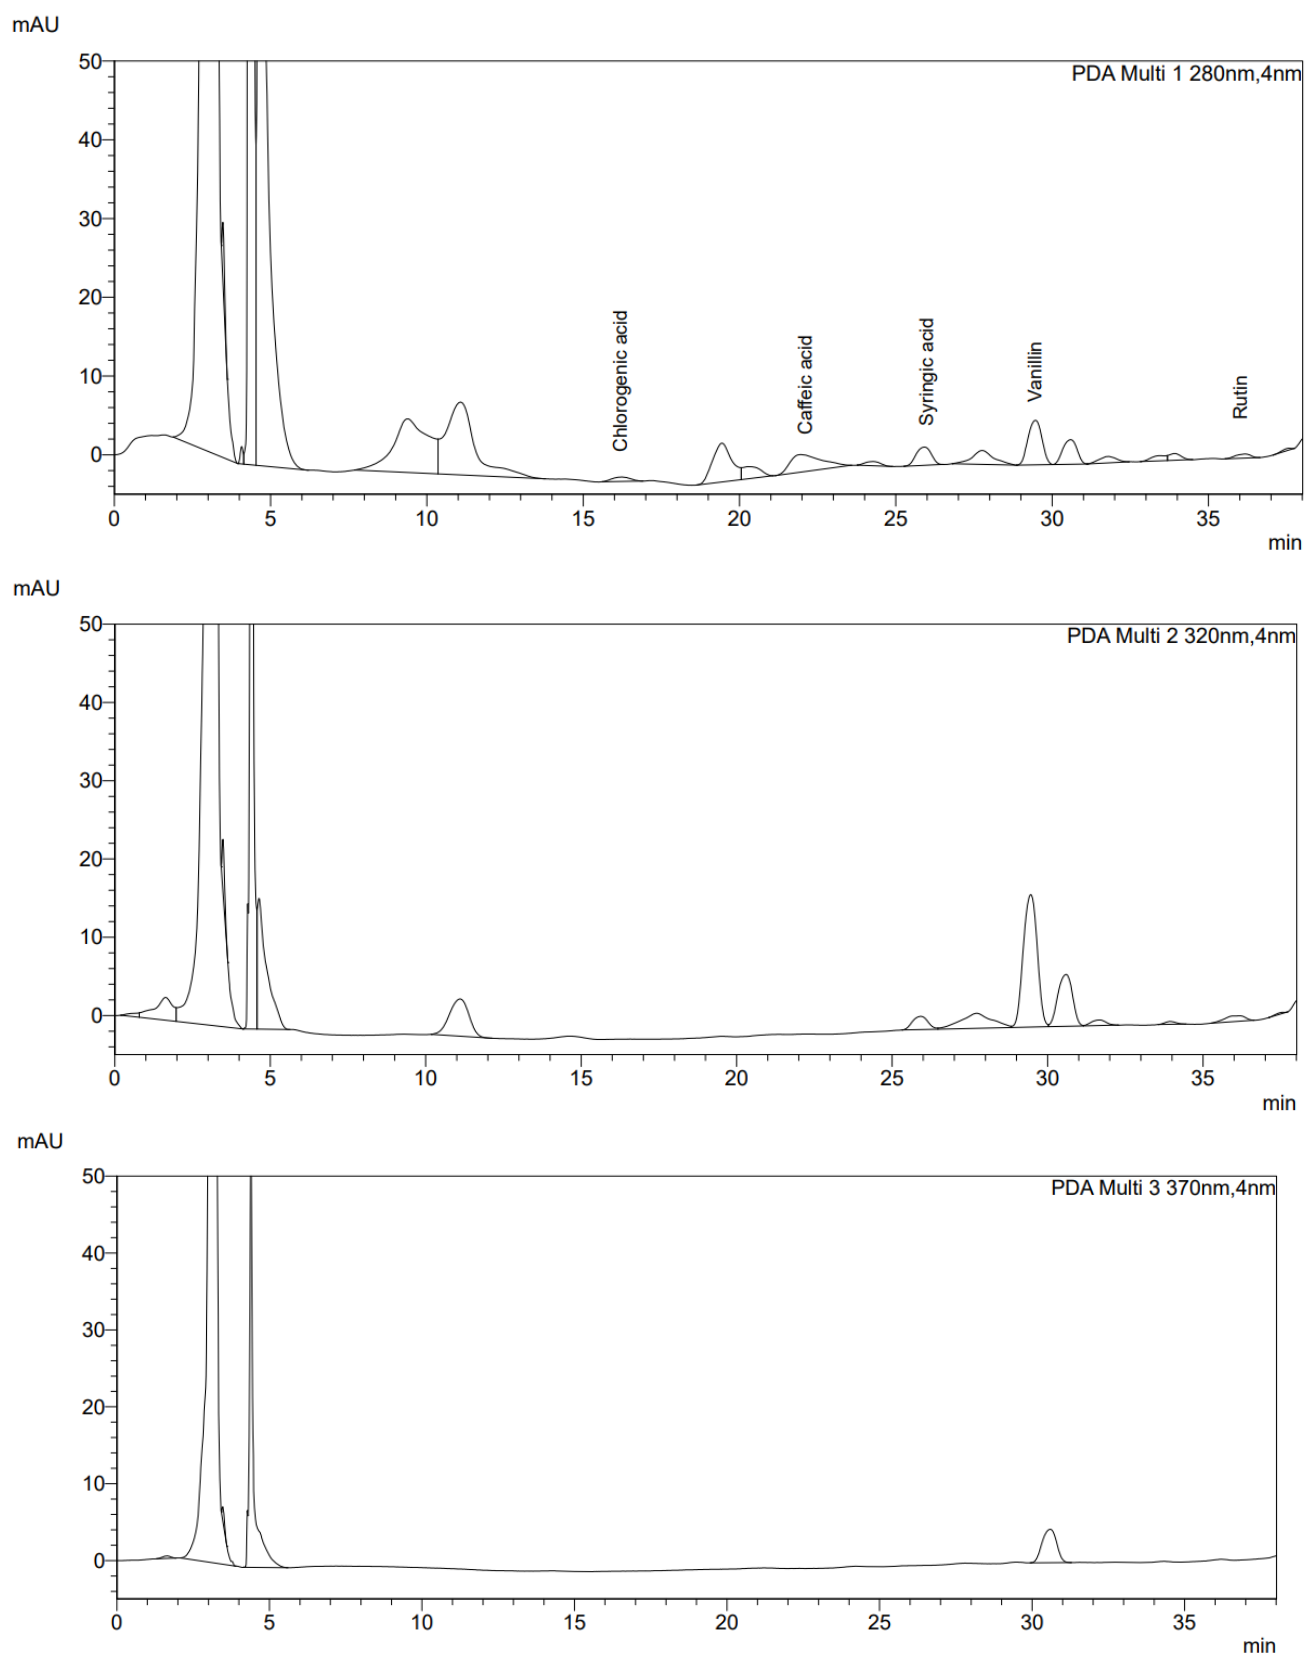

**Figure S3.** HPLC chromatograms of Taiwanese morning glory sprout extract at 10 mg/ml in methanol were detected at 280, 320, and 370 nm showing peaks for chlorogenic acid, caffeic acid, syringic acid, vanillin, rutin, and other unknown peaks.

**Supplementary Material, Figure S4**

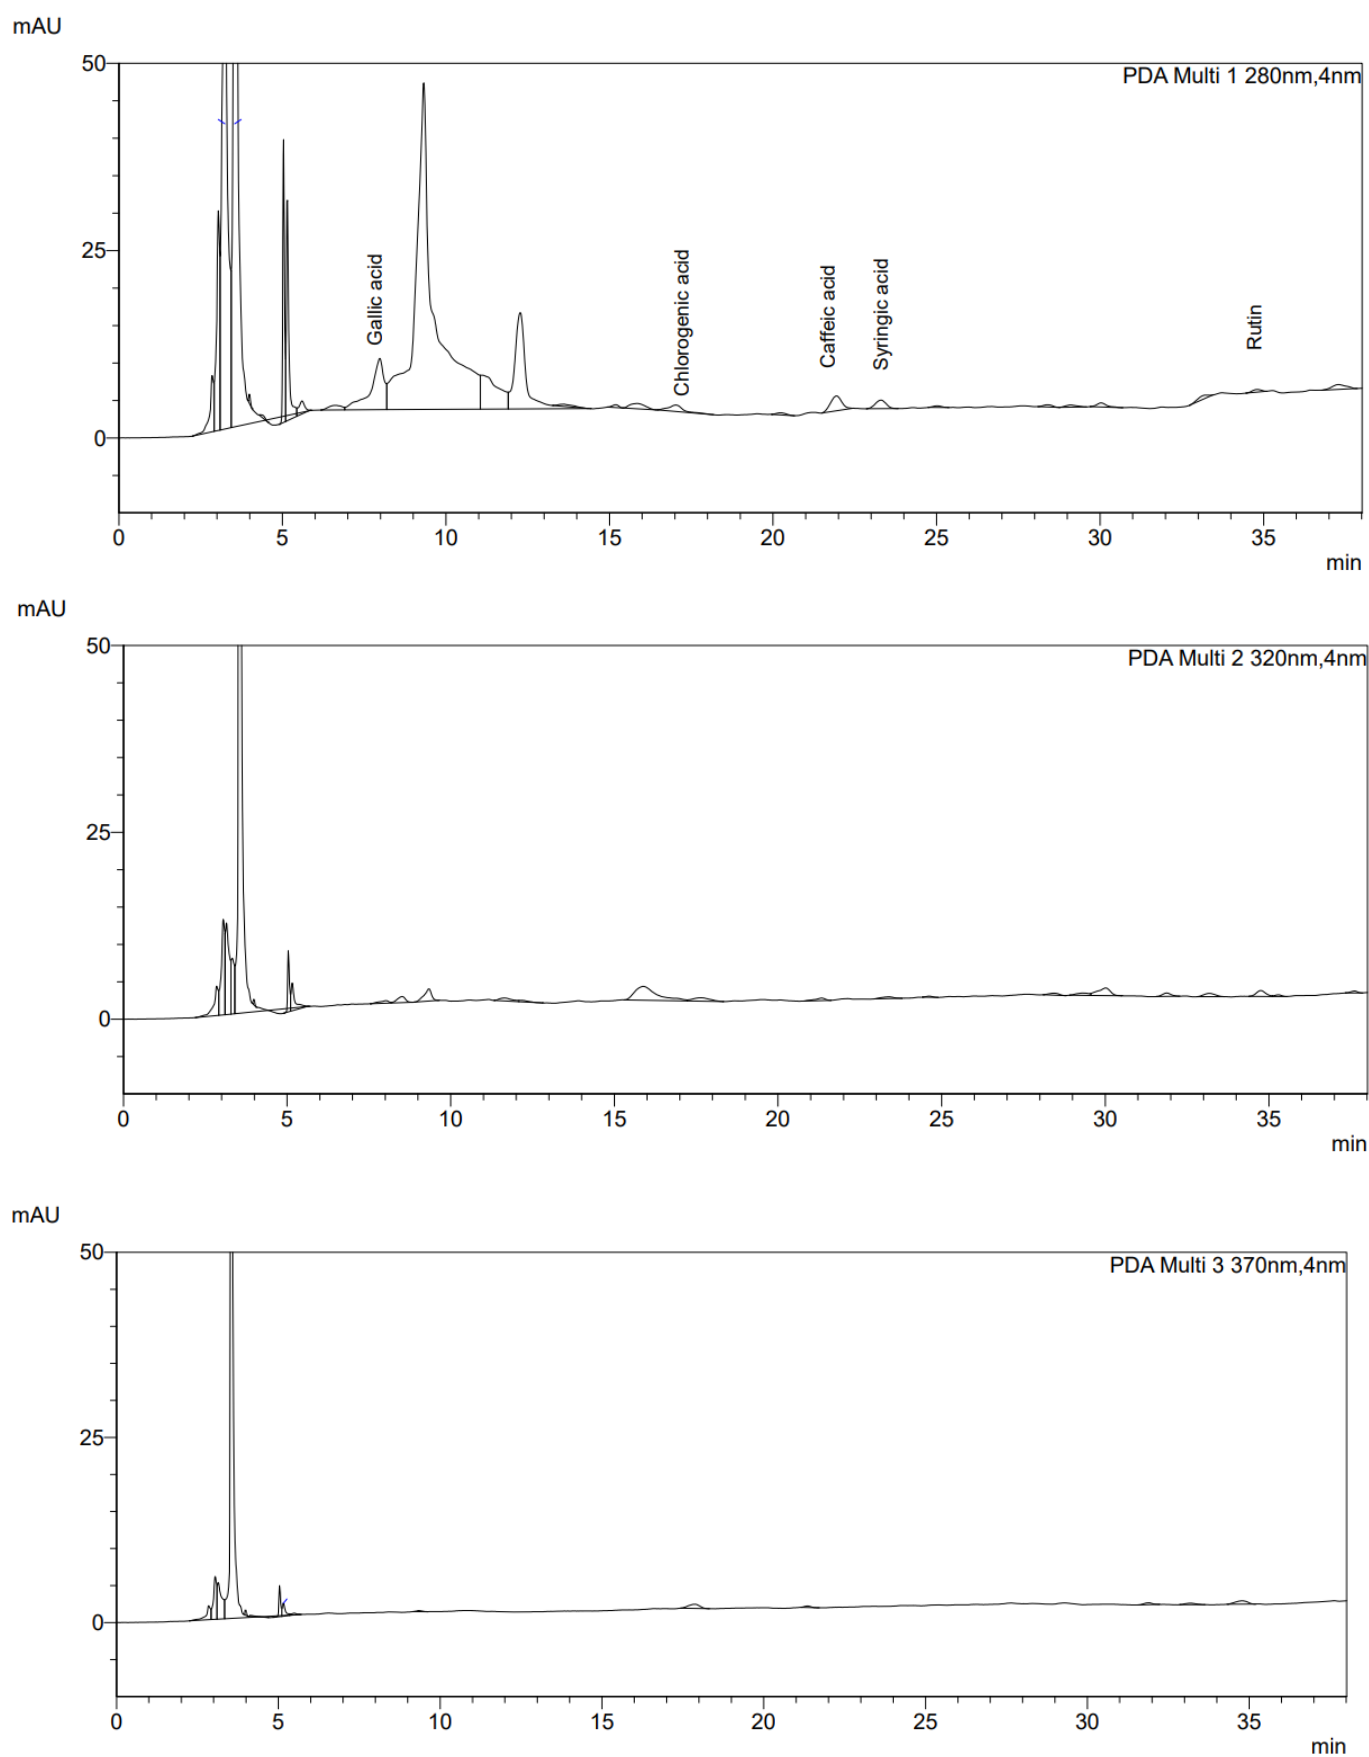

**Figure S4.** HPLC chromatograms of green pea sprout extract at 10 mg/ml in methanol were detected at 280, 320, and 370 nm showing peaks for gallic acid, chlorogenic acid, caffeic acid, syringic acid, rutin, and other unknown peaks.

**Supplementary Material, Figure S5**

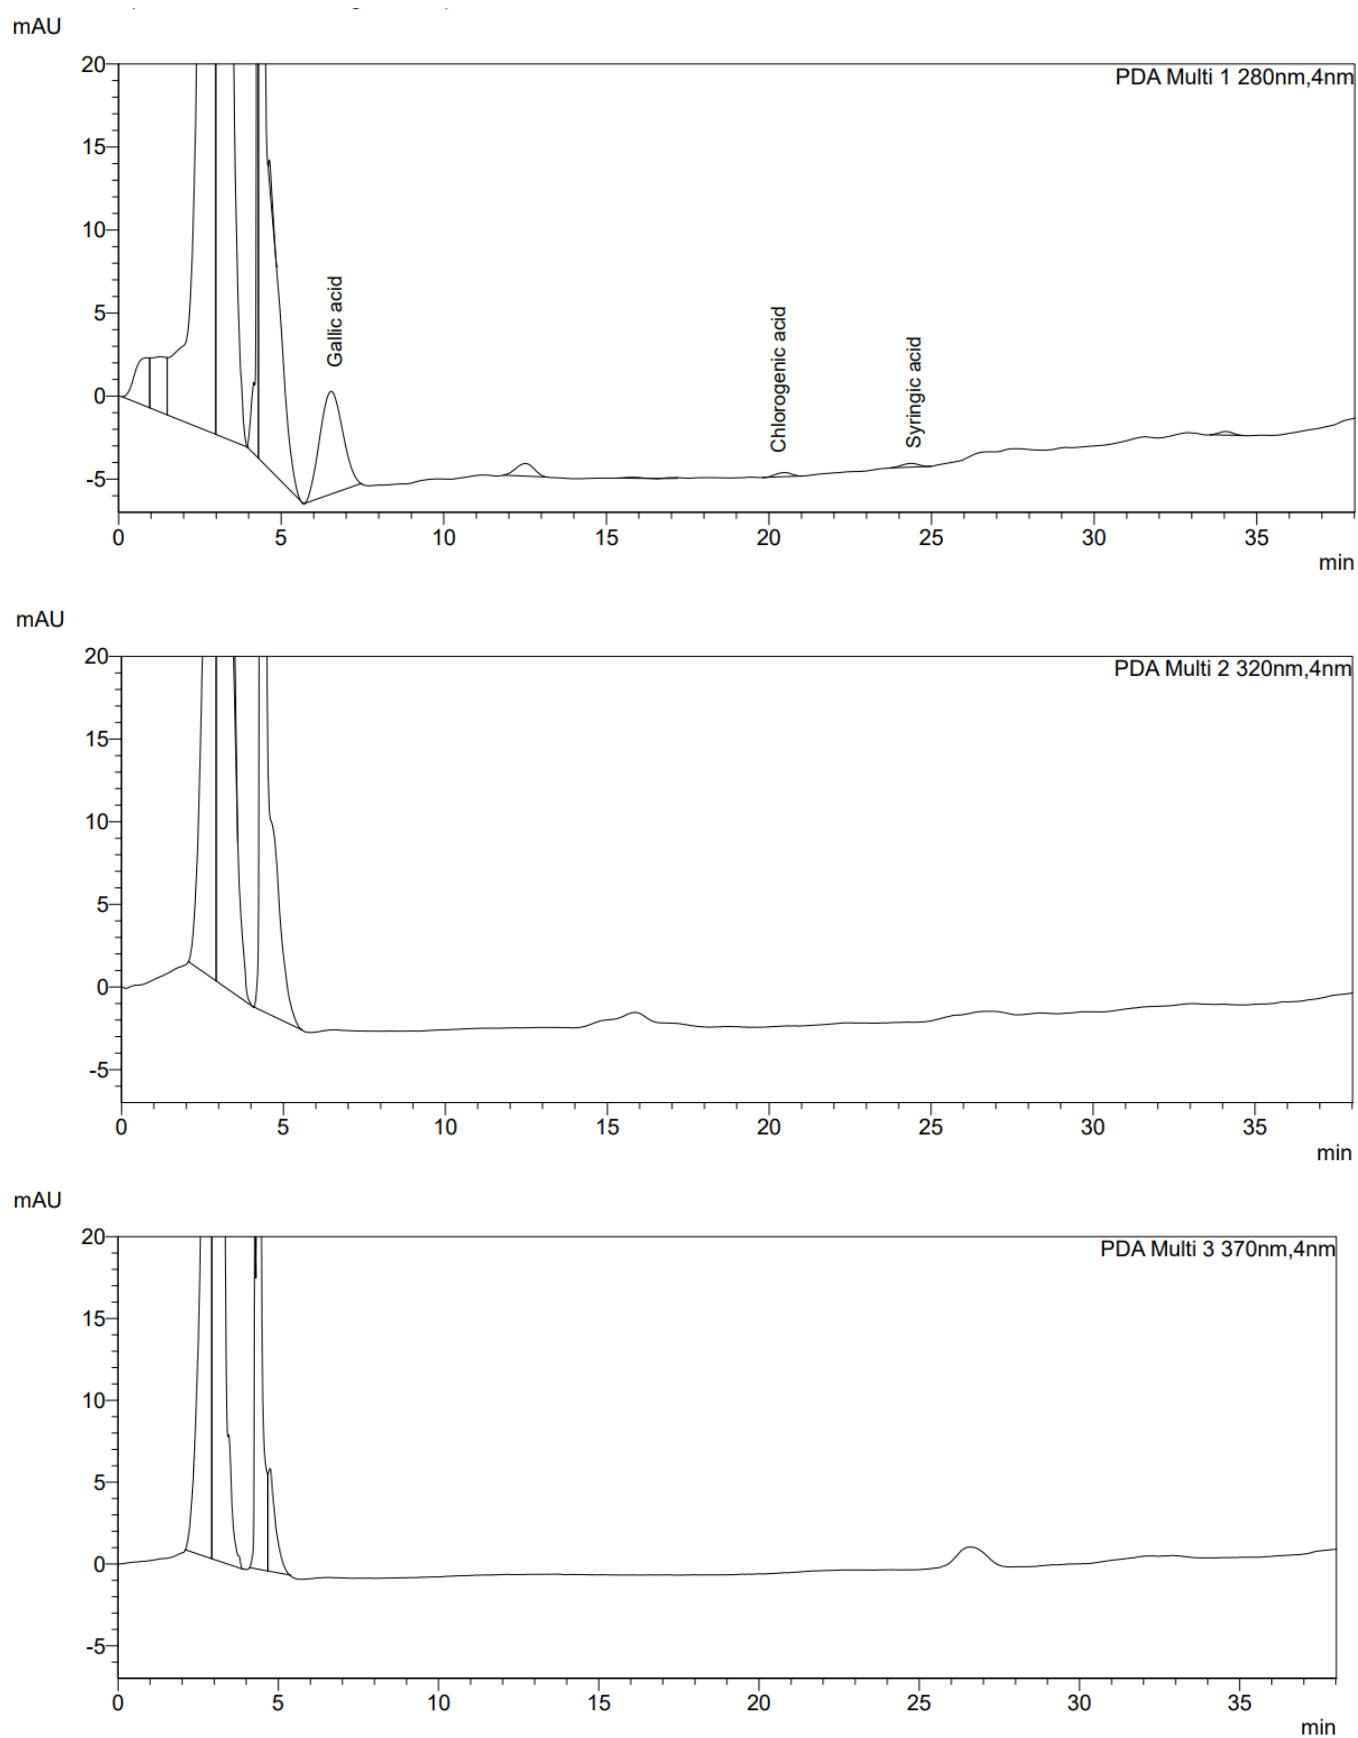

**Figure S5.** HPLC chromatograms of mung bean sprout extract at 10 mg/ml in methanol were detected at 280, 320, and 370 nm showing peaks for gallic acid, chlorogenic acid, syringic acid, and other unknown peaks.

**Supplementary Material, Figure S6**

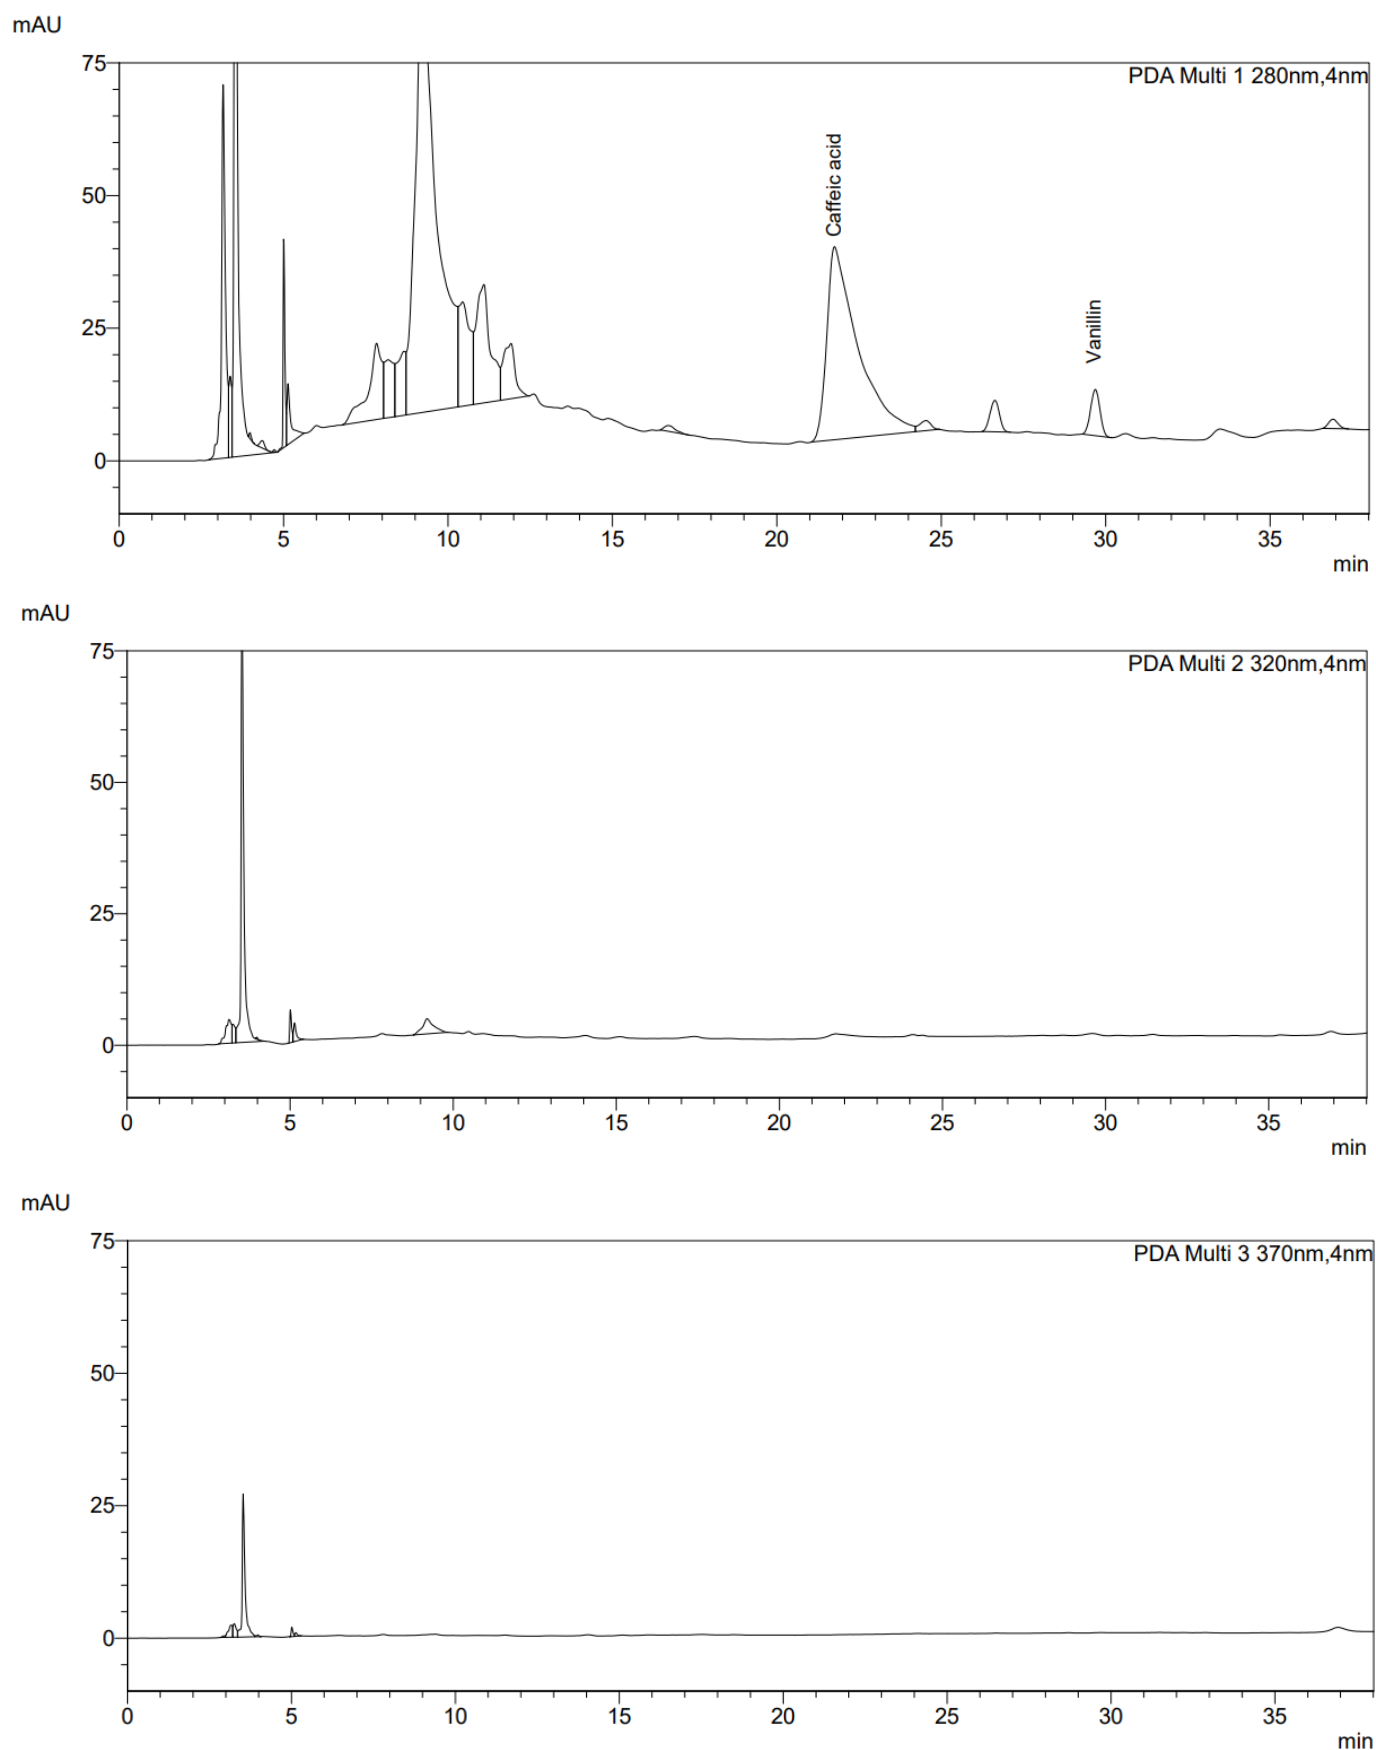

**Figure S6.** HPLC chromatograms of sunflower sprout extract at 10 mg/ml in methanol were detected at 280, 320, and 370 nm showing peaks for caffeic acid, vanillin, and other unknown peaks.

**Supplementary Material, Figure S7**

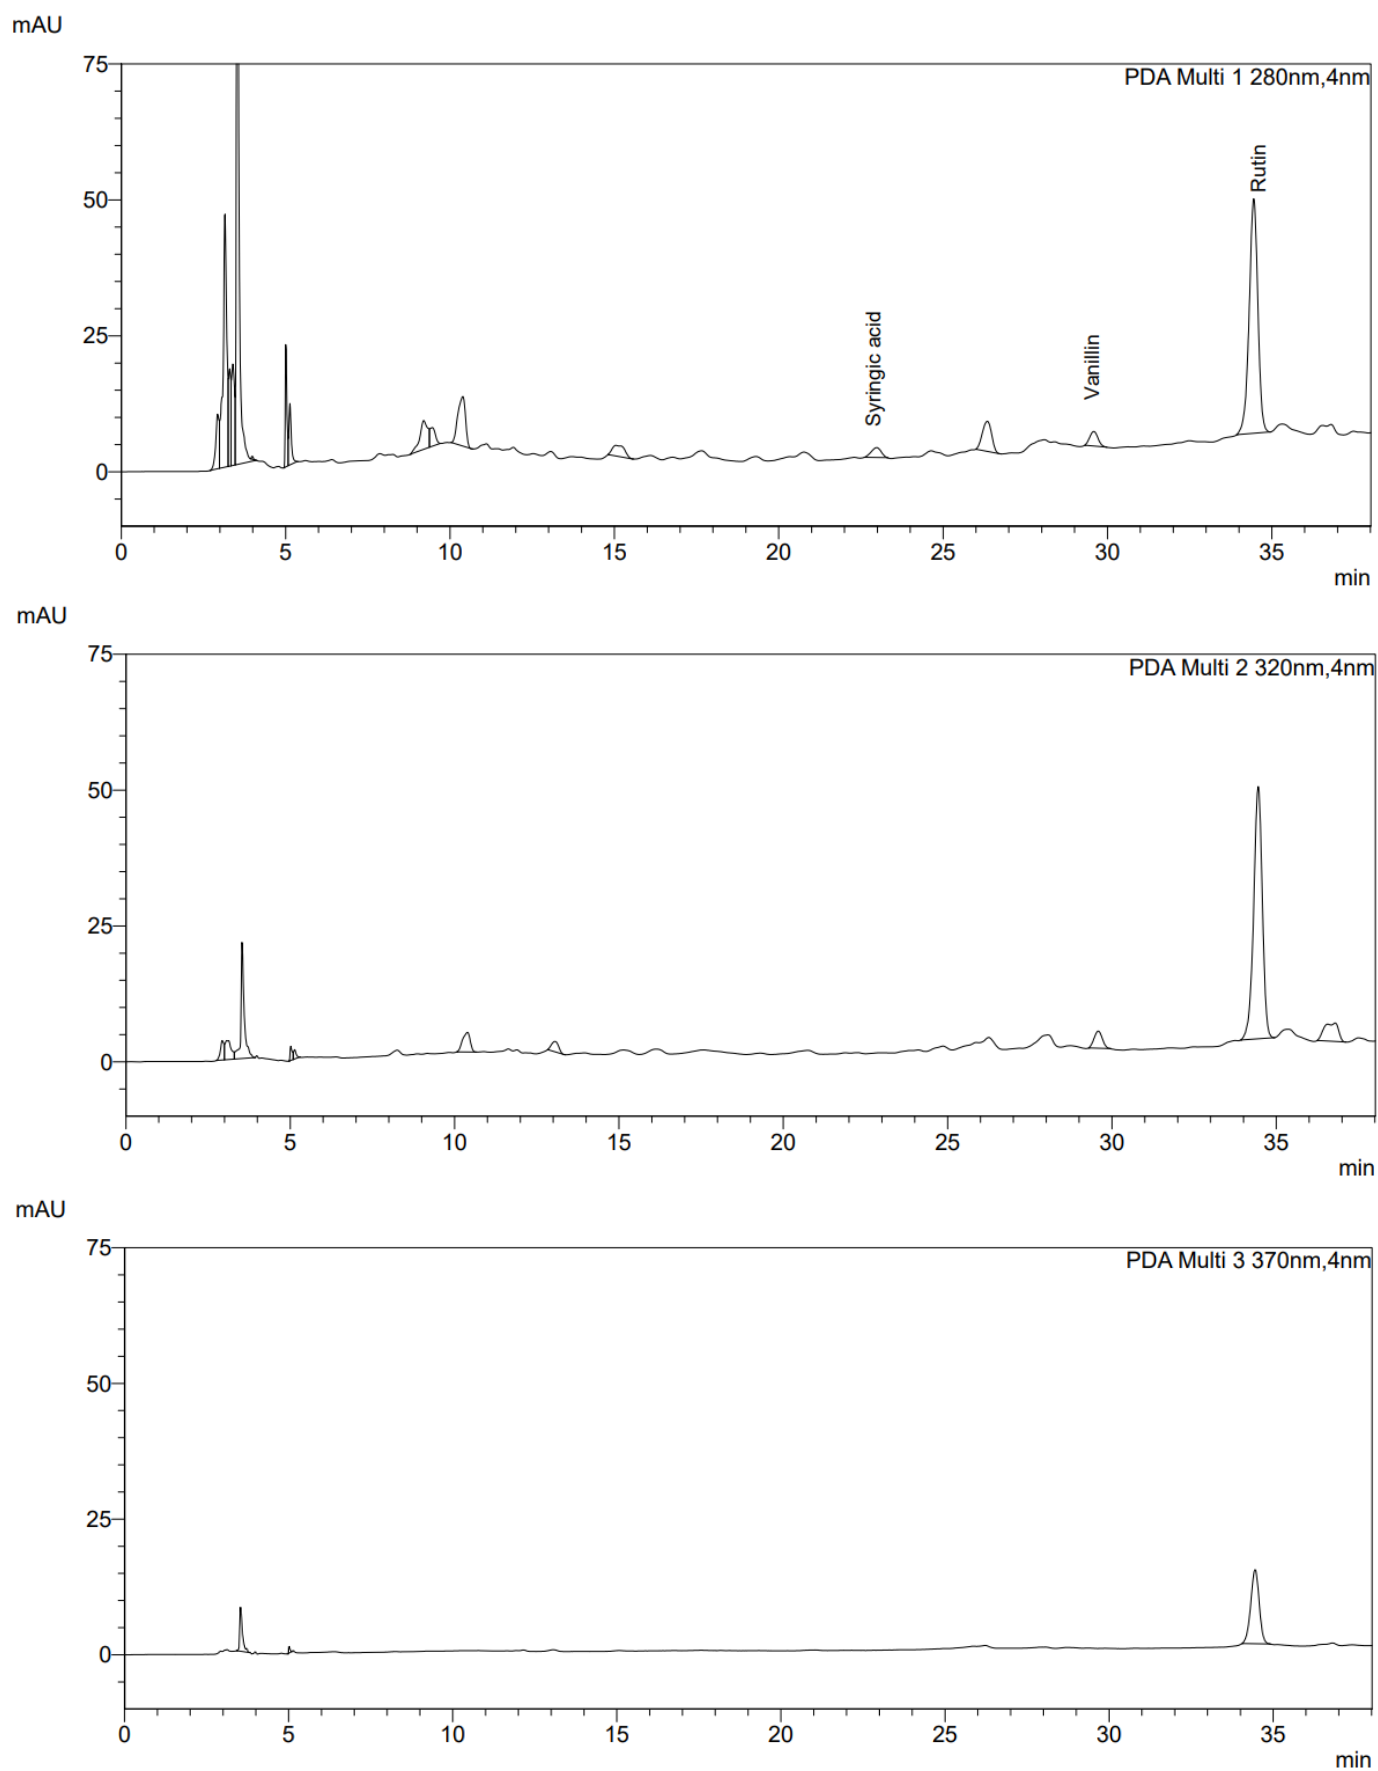

**Figure S7.** HPLC chromatograms of black sesame sprout extract at 10 mg/ml in methanol were detected at 280, 320, and 370 nm showing peaks for syringic acid, vanillin, rutin, and other unknown peaks.

**Supplementary Material, Figure S8**

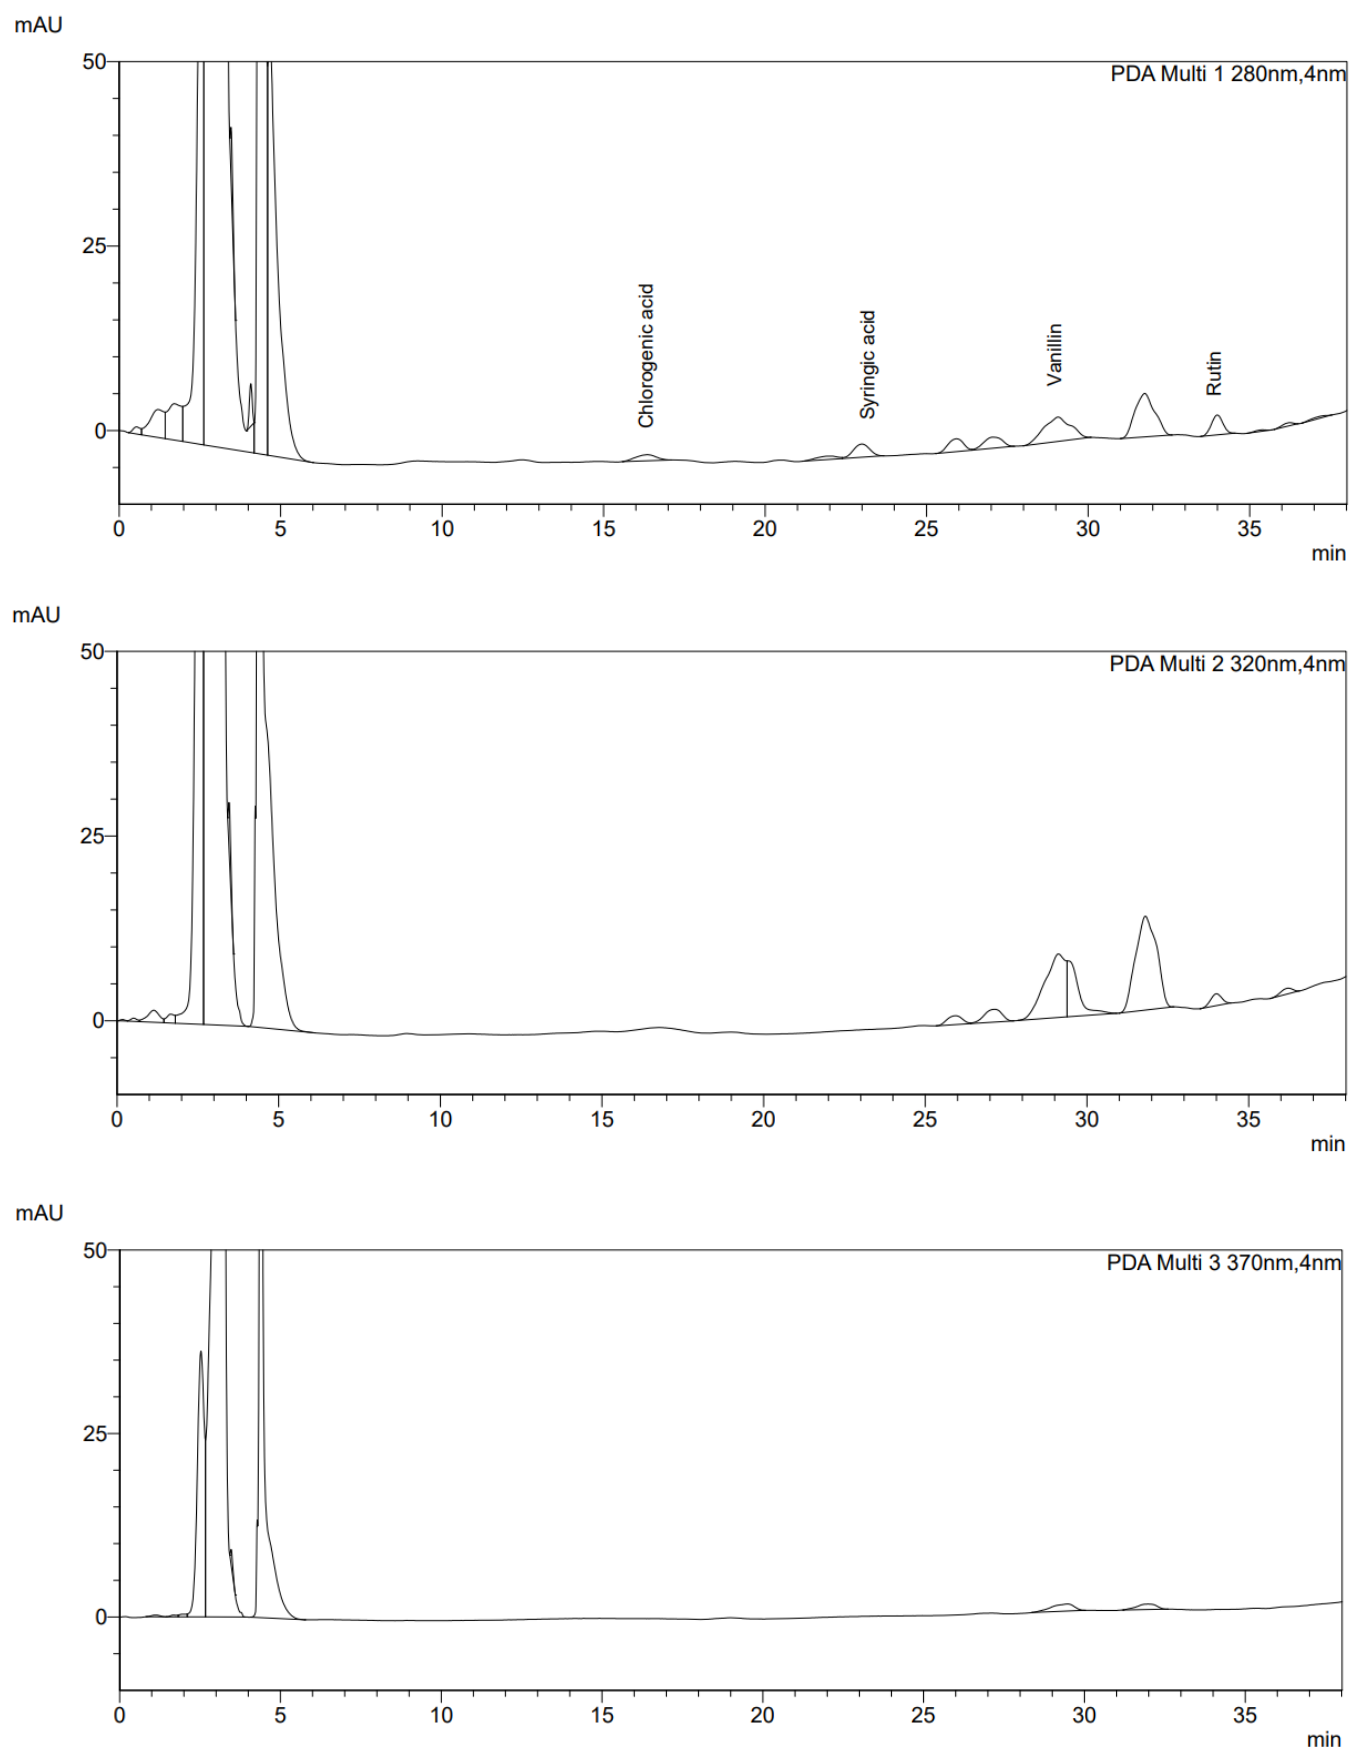

**Figure S8.** HPLC chromatograms of colored radish sprout extract at 10 mg/ml in methanol were detected at 280, 320, and 370 nm showing peaks for chlorogenic acid, syringic acid, vanillin, rutin, and other unknown peaks.

**Supplementary Material, Figure S9**

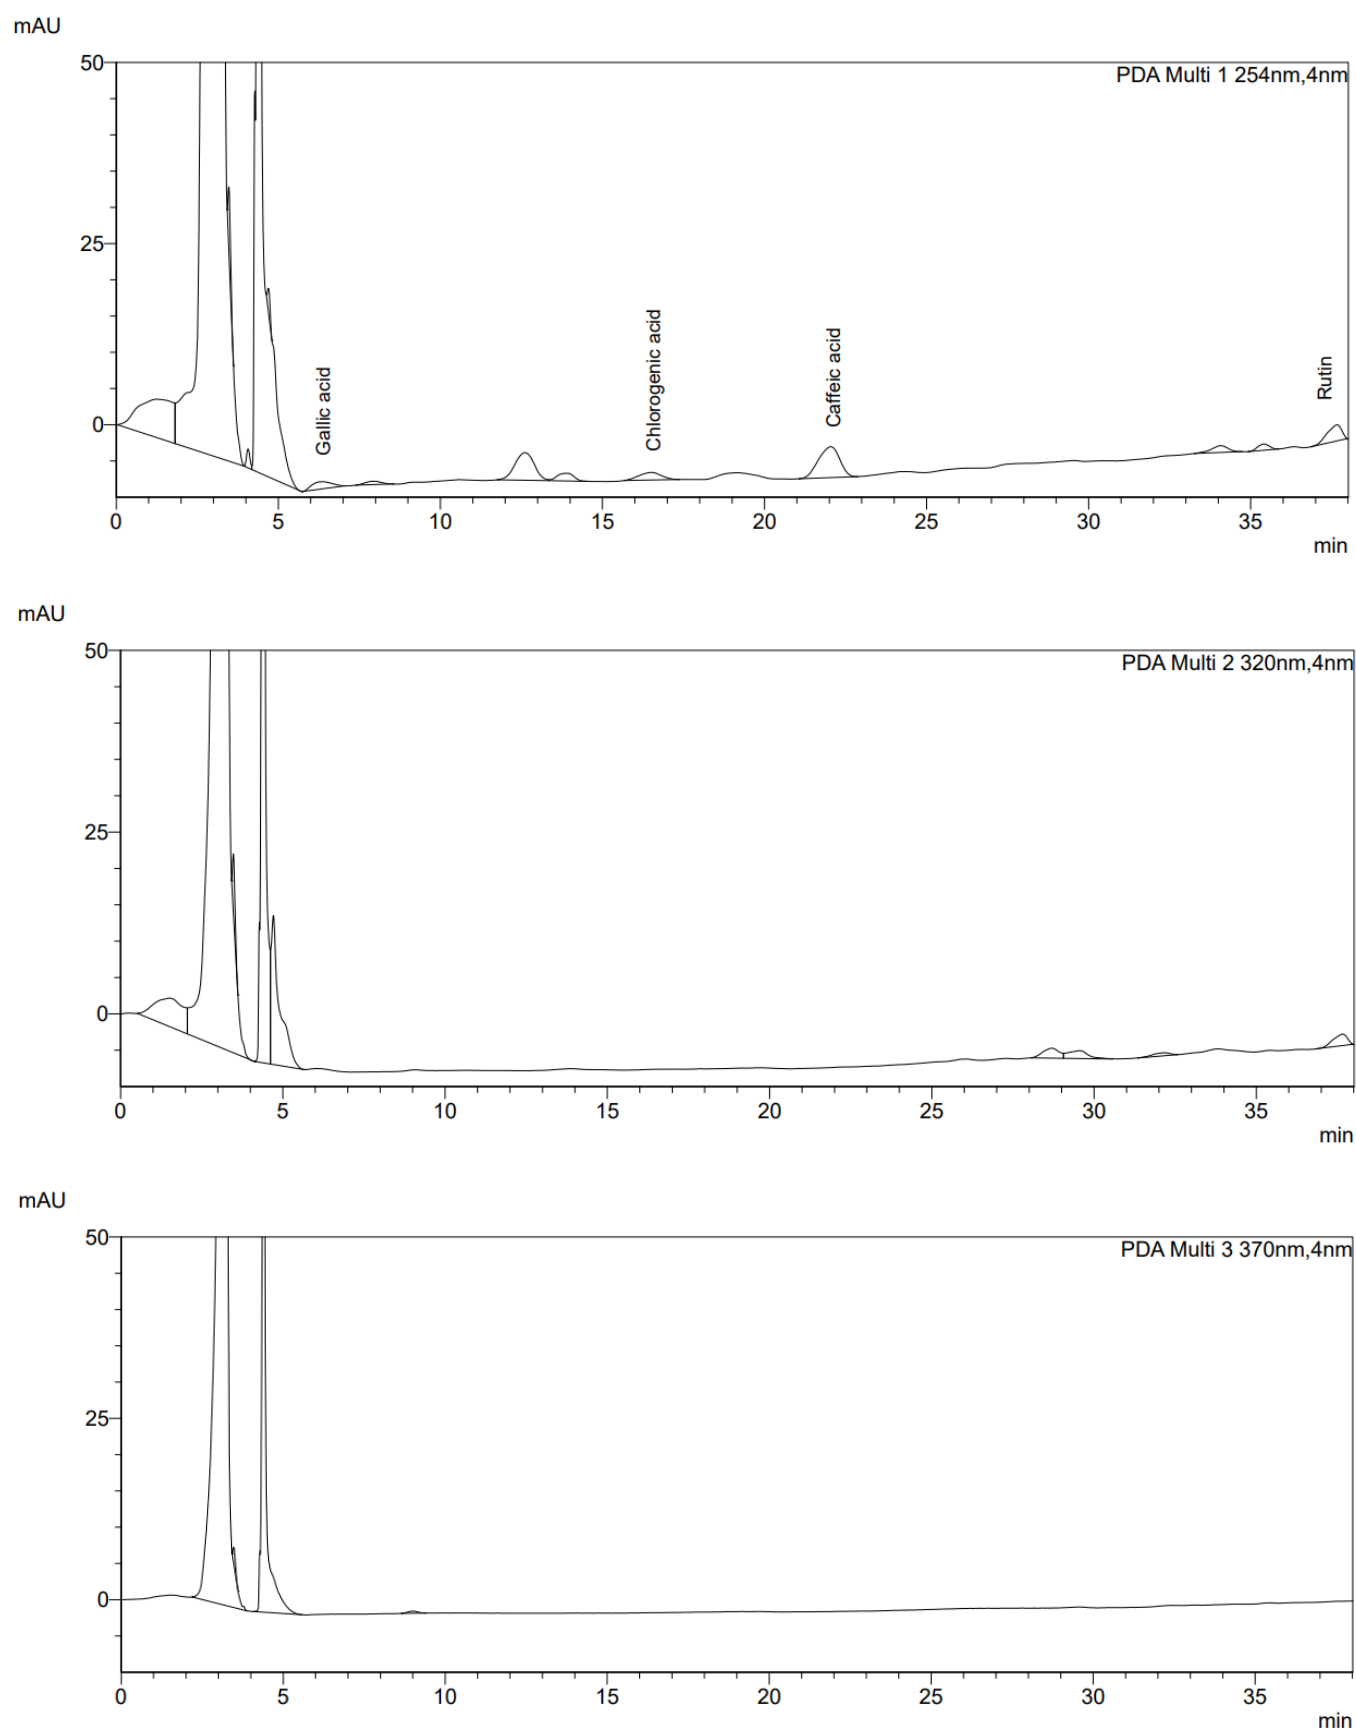

**Figure S9.** HPLC chromatograms of mustard sprout extract at 10 mg/ml in methanol were detected at 280, 320, and 370 nm showing peaks for gallic acid, chlorogenic acid, caffeic acid, rutin, and other unknown peaks.

**Supplementary Material, Figure S10**

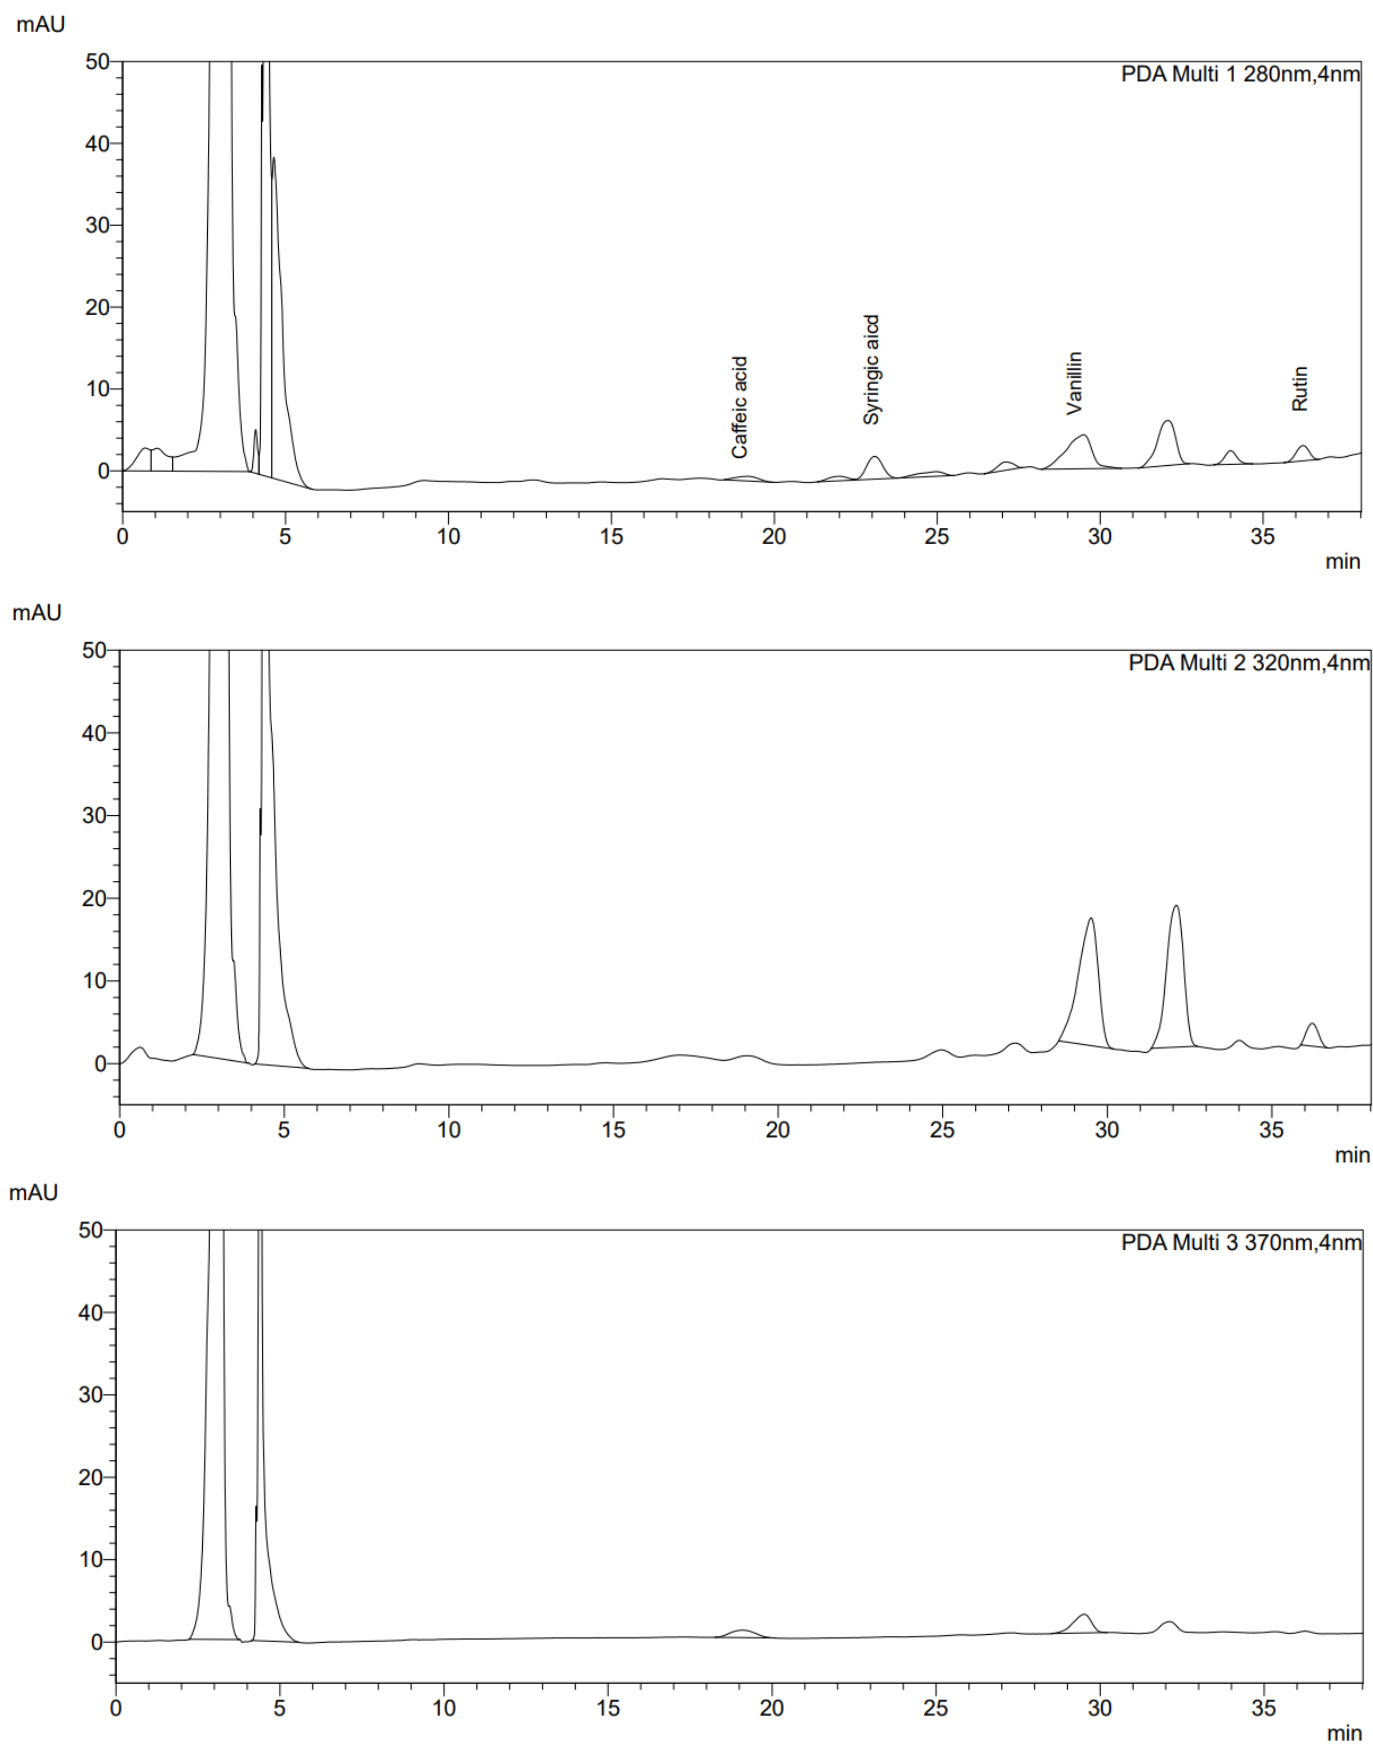

**Figure S10.** HPLC chromatograms of white radish sprout extract at 10 mg/ml in methanol were detected at 280, 320, and 370 nm showing peaks for syringic acid, caffeic acid, vanillin, rutin, and other unknown peaks.
